# Supplementary material for: A nutritional supplement taken during preconception and pregnancy influences human milk macronutrients in women with overweight/obesity and gestational diabetes mellitus
Source: PubMed Central journal article supplement (PMC10616264; doi:10.3389/fnut.2023.1282376), 2023-10-17
Supplement: Data_Sheet_1.pdf [file Data_Sheet_1.pdf]

## Supplementary Material

**Supplementary Table 1.** The inclusion, exclusion, and withdrawal criteria for participants in the NiPPeR study (adapted from Godfrey et al. *Trials* 2017;18:131).

| Inclusion criteria                                                                                                                                                                                                                                                                                                                                                                                                                                                                                                                                                                                                                              | Exclusion criteria                                                                                                                                                                                                                                                                                                                                                                                                                                                                                                                                                                                                                                                                                                                                                                                           | Withdrawal criteria                                                                                                                                                                                                                                                                                                                                                                                                                                                                                                                                                                                                                                                                                                                                                                                                                                                                                                                                                                                                                                                                       |
|-------------------------------------------------------------------------------------------------------------------------------------------------------------------------------------------------------------------------------------------------------------------------------------------------------------------------------------------------------------------------------------------------------------------------------------------------------------------------------------------------------------------------------------------------------------------------------------------------------------------------------------------------|--------------------------------------------------------------------------------------------------------------------------------------------------------------------------------------------------------------------------------------------------------------------------------------------------------------------------------------------------------------------------------------------------------------------------------------------------------------------------------------------------------------------------------------------------------------------------------------------------------------------------------------------------------------------------------------------------------------------------------------------------------------------------------------------------------------|-------------------------------------------------------------------------------------------------------------------------------------------------------------------------------------------------------------------------------------------------------------------------------------------------------------------------------------------------------------------------------------------------------------------------------------------------------------------------------------------------------------------------------------------------------------------------------------------------------------------------------------------------------------------------------------------------------------------------------------------------------------------------------------------------------------------------------------------------------------------------------------------------------------------------------------------------------------------------------------------------------------------------------------------------------------------------------------------|
| <ul style="list-style-type: none"> <li>• Women aged 18-38 years</li> <li>• Living in Southampton, Singapore, or Auckland</li> <li>• In Southampton and Auckland, planning to have future maternity care in Southampton and Auckland, respectively</li> <li>• In Singapore, willing to deliver at the National University Hospital</li> <li>• Planning to conceive within 6 months (although conception up to 12 months after phenotyping deemed acceptable)</li> <li>• In Singapore, being of Chinese, Malay, or Indian ethnicity, or of mixed Chinese/Malay/Indian ethnicity</li> <li>• Ability to provide written informed consent</li> </ul> | <ul style="list-style-type: none"> <li>• Pregnant or currently breastfeeding</li> <li>• Assisted fertility apart from those taking clomiphene or letrozole alone</li> <li>• Pre-existing type 1 or type 2 diabetes (defined as a fasting plasma glucose concentration <math>\geq 7.0</math> mmol/L or post OGTT 2-hour plasma glucose concentration <math>\geq 11.1</math> mmol/L)</li> <li>• Oral or implanted contraception currently or in the last month, or with an intrauterine contraceptive device in situ</li> <li>• Use of metformin or systemic steroids currently or in the last month</li> <li>• Use of anticonvulsant medication currently or in the last month</li> <li>• Treatment for HIV, Hepatitis B or C currently or in the last month</li> <li>• Known serious food allergy</li> </ul> | <ul style="list-style-type: none"> <li>• Participant wishes to withdraw from the study</li> <li>• Participant unwilling or unable to comply with the study protocol (including attendance at study visits, undergoing clinical assessments or biosampling)</li> <li>• An overall uptake level of intervention/control nutritional drink of less than 60% evidenced by sachet counting, each case reviewed by the investigators.</li> <li>• Pregnancy before or at preconception visit 2 (4-6 weeks after randomisation)</li> <li>• Miscarriage (pregnancy loss before 24 weeks of gestation) or ectopic pregnancy. In the event of a first-trimester pregnancy loss, participant could re-join the study with the same randomisation code</li> <li>• Multiple pregnancy (twins or other multiples)</li> <li>• Infant death in the perinatal period (for post-birth secondary outcomes)</li> <li>• Any adverse reaction deemed by the investigators to be causally related to the intervention</li> <li>• Withdrawal at the discretion of the investigators for medical reasons</li> </ul> |

**Supplementary Table 2.** Number of participants according to reason for exclusion from the NiPPeR study by site.

| Study phase | Reason for exclusion                     | Control   |             | Intervention |             |
|-------------|------------------------------------------|-----------|-------------|--------------|-------------|
|             |                                          | Singapore | New Zealand | Singapore    | New Zealand |
| Pregnancy   | Miscarriage ( $\leq 24$ weeks gestation) | 20        | 14          | 18           | 21          |
|             | Twin pregnancy                           | 1         | 1           | 1            | 2           |
|             | Ectopic pregnancy                        | 1         | 2           | 1            | –           |
|             | Termination*                             | 2         | 1           | –            | –           |
|             | Other medical reasons                    | –         | 1           | –            | 1           |
|             | Lost to follow-up                        | 2         | 2           | 3            | 2           |
| Birth       | Lost to follow-up                        | 2         | 1           | 2            | –           |
|             | Infant's medical reasons                 | –         | 1           | –            | 1           |
|             | Stillbirth                               | –         | –           | –            | 1           |

\* Includes one case of Klinefelter syndrome and other unknown reasons.

**Supplementary Table 3.** Number of values excluded from analyses for each human milk macronutrient measured in the NiPPeR study.

| Macronutrient | Outside the range of the mean $\pm 5 \times$ SD (n) |
|---------------|-----------------------------------------------------|
| Fat           | nil                                                 |
| Energy        | nil                                                 |
| Lactose       | 10                                                  |
| Crude protein | 1                                                   |

SD, standard deviation.

In total, 17 samples with at least one '0' measurement (out of 1181 samples or 1.4%) were excluded from analyses due to the likelihood of a sample dilution issue.

**Supplementary Table 4.** Baseline and perinatal characteristics of 336 participants in Singapore and New Zealand in the NiPPeR study who provided at least one human milk in the first 12 months of lactation.

| PARAMETERS                                           | LEVELS                          | SINGAPORE          | NEW ZEALAND        | P-VALUE |
|------------------------------------------------------|---------------------------------|--------------------|--------------------|---------|
| <b>n</b>                                             |                                 | 158 (47.0%)        | 178 (53.0%)        |         |
| <b>Adherence (%)</b>                                 |                                 | 89.6 (83.3 – 95.3) | 90.1 (82.8 – 96.4) | n.s.    |
| <b>Duration of supplementation (days)</b>            |                                 | 395 ± 101          | 403 ± 102          | n.s.    |
| <b>Ethnicity</b>                                     | Caucasian                       | –                  | 135 (75.8%)        | < 0.001 |
|                                                      | Chinese                         | 124 (78.5%)        | 15 (8.4%)          |         |
|                                                      | South Asian                     | 12 (7.6%)          | 8 (4.5%)           |         |
|                                                      | Malay                           | 20 (12.7%)         | –                  |         |
|                                                      | Other                           | 2 (1.3%)           | 20 (11.2%)         |         |
| <b>Maternal age at delivery (years)</b>              |                                 | 31.8 ± 2.9         | 32.4 ± 3.2         | n.s.    |
| <b>Maternal age at delivery group</b>                | < 35 years                      | 134 (84.8%)        | 141 (79.2%)        | n.s.    |
|                                                      | ≥ 35 years                      | 24 (15.2%)         | 37 (20.8%)         |         |
| <b>Maternal pre-pregnancy BMI (kg/m<sup>2</sup>)</b> |                                 | 22.8 ± 4.6         | 24.7 ± 5.0         | < 0.001 |
| <b>Maternal pre-pregnancy BMI status</b>             | Underweight/normal weight       | 126 (79.7%)        | 117 (65.7%)        | 0.019   |
|                                                      | Overweight                      | 19 (12.0%)         | 37 (20.8%)         |         |
|                                                      | Obesity                         | 12 (7.6%)          | 24 (13.5%)         |         |
|                                                      | Missing                         | 1 (0.6%)           | –                  |         |
| <b>Highest level of education</b>                    | Bachelor's degree or higher     | 125 (79.1%)        | 146 (82.0%)        | n.s.    |
|                                                      | Lesser qualification*           | 33 (20.9%)         | 32 (18.0%)         |         |
| <b>Household income quintile</b>                     | 5 (lowest)                      | 4 (2.5%)           | 1 (0.6%)           | < 0.001 |
|                                                      | 4                               | 23 (14.6%)         | 5 (2.8%)           |         |
|                                                      | 3                               | 53 (33.5%)         | 33 (18.5%)         |         |
|                                                      | 2                               | 48 (30.4%)         | 67 (37.6%)         |         |
|                                                      | 1 (highest)                     | 24 (15.2%)         | 62 (34.8%)         |         |
|                                                      | Missing                         | 6 (3.8%)           | 10 (5.6%)          |         |
| <b>Smoking during pregnancy</b>                      | None                            | 124 (78.5%)        | 157 (88.2%)        | n.s.    |
|                                                      | Passive                         | 30 (19.0%)         | 19 (10.7%)         |         |
|                                                      | Active                          | 4 (2.5%)           | 2 (1.1%)           |         |
| <b>Gestational diabetes mellitus</b>                 | No GDM                          | 93 (58.9%)         | 149 (83.7%)        | < 0.001 |
|                                                      | GDM                             | 55 (34.8%)         | 28 (15.7%)         |         |
|                                                      | Excluded                        | 10 (6.3%)          | 1 (0.6%)           |         |
| <b>Mode of delivery</b>                              | Vaginal delivery                | 123 (77.8%)        | 120 (67.4%)        | 0.033   |
|                                                      | Caesarean section               | 35 (22.2%)         | 58 (32.6%)         |         |
| <b>Infant birth weight (kg)</b>                      |                                 | 3.0 ± 0.44         | 3.4 ± 0.52         | < 0.001 |
| <b>Infant birth weight status</b>                    | Appropriate for gestational age | 132 (83.5%)        | 153 (86.0%)        | < 0.001 |
|                                                      | Large for gestational age       | 1 (0.6%)           | 15 (8.4%)          |         |
|                                                      | Small for gestational age       | 25 (15.8%)         | 10 (5.6%)          |         |
| <b>Infant gestational age (weeks)</b>                |                                 | 38.8 ± 1.5         | 39.6 ± 1.5         | < 0.001 |
| <b>Infant gestational age group</b>                  | Preterm                         | 14 (8.9%)          | 11 (6.2%)          | n.s.    |
|                                                      | Term or post-term               | 144 (91.1%)        | 167 (93.8%)        |         |
| <b>Parity</b>                                        | Primiparous                     | 83 (52.5%)         | 125 (70.2%)        | 0.001   |
|                                                      | Multiparous                     | 75 (47.5%)         | 53 (29.8%)         |         |
| <b>Infant sex</b>                                    | Male                            | 78 (49.4%)         | 76 (42.7%)         | n.s.    |
|                                                      | Female                          | 80 (50.6%)         | 102 (57.3%)        |         |

Data are n (%), mean ± standard deviation (SD), or median (Q1 – Q3). p-values from independent samples *t*-test for continuous variables or Chi-square tests for categorical variables. Adherence to the study protocol was determined by sachet counting. Duration of supplementation calculated by counting the number of days from randomization date to delivery date. Body mass index (BMI) status was defined as per World Health Organisation: underweight/normal weight < 25.0 kg/m<sup>2</sup>, overweight 25.0–29.99 kg/m<sup>2</sup>, obesity ≥ 30.0 kg/m<sup>2</sup> (World Health Organ Tech Rep Ser 2000;894:i-xii, 1-253). Gestational diabetes mellitus (GDM) was defined by International Association of Diabetes and Pregnancy Study Groups criteria (Diabetes Care 2010;33:676-82). Birth weight categories were determined using the Royal College of Paediatrics and Child Health 2009 U.K.-World Health Organization growth charts (Ann Hum Biol 2011;38(1):7-11). Gestational age was determined using a pre-specified algorithm as previously described (Thorax 2010;65:1099–106) with preterm defined as birth < 37 weeks of gestation, and term or post-term as birth at ≥ 37 weeks of gestation. \*Including incomplete and complete high school qualifications, and other tertiary level qualifications below bachelors (e.g. diploma or certificate). n.s., not statistically significant at p<0.05.

**Supplementary Table 5.** The average macronutrient concentrations in human milk over the first 3 months of lactation in intervention and control groups in the NiPPeR Study.

|                         | <b>Intervention</b> | <b>Control</b>    | <b>aMD</b>        | <b>p-value</b> |
|-------------------------|---------------------|-------------------|-------------------|----------------|
| <b>Overall</b>          |                     |                   |                   |                |
| Fat (g/100mL)           | 3.81 (3.65, 3.98)   | 3.71 (3.55, 3.87) | 1.03 (0.97, 1.09) | 0.367          |
| Energy (kcal/100mL)     | 70.3 (68.9, 71.8)   | 69.8 (68.4, 71.3) | 1.01 (0.98, 1.04) | 0.609          |
| Lactose (g/100mL)       | 7.07 (7.01, 7.12)   | 7.05 (7.00, 7.11) | 1.00 (0.99, 1.01) | 0.745          |
| Crude protein (g/100mL) | 1.29 (1.25, 1.33)   | 1.32 (1.28, 1.36) | 0.97 (0.93, 1.02) | 0.243          |
| <b>Singapore</b>        |                     |                   |                   |                |
| Fat (g/100mL)           | 3.88 (3.68, 4.09)   | 3.67 (3.48, 3.87) | 1.06 (0.98, 1.14) | 0.153          |
| Energy (kcal/100mL)     | 70.7 (68.9, 72.6)   | 69.5 (67.7, 71.4) | 1.02 (0.98, 1.06) | 0.354          |
| Lactose (g/100mL)       | 7.02 (6.94, 7.10)   | 7.03 (6.95, 7.11) | 1.00 (0.98, 1.02) | 0.890          |
| Crude protein (g/100mL) | 1.28 (1.23, 1.33)   | 1.33 (1.28, 1.38) | 0.96 (0.91, 1.02) | 0.162          |
| <b>New Zealand</b>      |                     |                   |                   |                |
| Fat (g/100mL)           | 3.75 (3.49, 4.04)   | 3.82 (3.56, 4.09) | 0.98 (0.89, 1.09) | 0.751          |
| Energy (kcal/100mL)     | 70.3 (67.9, 72.8)   | 70.7 (68.5, 73.0) | 0.99 (0.95, 1.04) | 0.815          |
| Lactose (g/100mL)       | 7.12 (7.04, 7.21)   | 7.07 (6.99, 7.14) | 1.01 (0.99, 1.02) | 0.322          |
| Crude protein (g/100mL) | 1.29 (1.22, 1.36)   | 1.30 (1.24, 1.37) | 0.99 (0.92, 1.07) | 0.826          |

Data are least-squares means (i.e., adjusted mean) for each group or the adjusted mean difference (aMD) and respective 95% confidence intervals derived from repeated measures analyses, adjusted for randomisation group, visit, their interaction term (group\*visit), study site (for overall only), maternal pre-pregnancy BMI, gestational age at birth, and adherence. All data have been log-transformed to approximate a normal distribution and then back-transformed; thus, the aMD represents a proportional difference between the groups (i.e., intervention vs control).

**Supplementary Table 6.** Overall macronutrient concentrations in human milk of participants in New Zealand in the NiPPeR study, during the first 12 months of lactation.

| <b>Macronutrient</b>    | <b>1 week</b> | <b>3 weeks</b> | <b>6 weeks</b> | <b>3 months</b> | <b>6 months</b> | <b>9 months</b> | <b>12 months</b> |
|-------------------------|---------------|----------------|----------------|-----------------|-----------------|-----------------|------------------|
| Fat (g/100mL)           | 3.71 ± 1.39   | 3.91 ± 1.00    | 4.03 ± 1.22    | 4.07 ± 1.33     | 3.79 ± 1.73     | 4.56 ± 1.61     | 4.71 ± 1.93      |
| Energy (kcal/100mL)     | 70.6 ± 12.1   | 71.0 ± 9.5     | 71.0 ± 11.1    | 70.1 ± 12.2     | 67.2 ± 15.5     | 73.8 ± 14.6     | 75.1 ± 17.3      |
| Lactose (g/100mL)       | 7.15 ± 0.43   | 7.18 ± 0.35    | 7.11 ± 0.49    | 7.01 ± 0.40     | 7.09 ± 0.37     | 6.89 ± 0.47     | 6.89 ± 0.40      |
| Crude protein (g/100mL) | 1.75 ± 0.23   | 1.45 ± 0.26    | 1.20 ± 0.25    | 1.02 ± 0.34     | 0.90 ± 0.29     | 0.92 ± 0.29     | 0.95 ± 0.25      |

Data are the unadjusted means ± standard deviations.

**Supplementary Table 7.** The average macronutrient concentrations in human milk (HM) over the first 3 months of lactation in various maternal and infant sub-groups.

| <b>Maternal ethnicity</b> | <b>Asian</b>       | <b>Non-Asian</b>     | <b>aMD</b>        | <b>p-value</b> |
|---------------------------|--------------------|----------------------|-------------------|----------------|
| Fat (g/100mL)             | 3.80 (3.57, 4.04)  | 3.70 (3.40, 4.02)    | 1.03 (0.90, 1.17) | 0.683          |
| Energy (kcal/100mL)       | 70.5 (68.5, 72.6)  | 69.5 (66.8, 72.2)    | 1.01 (0.95, 1.08) | 0.645          |
| Lactose (g/100mL)         | 7.08 (7.00, 7.16)  | 7.03 (6.92, 7.14)    | 1.01 (0.98, 1.03) | 0.073          |
| Crude protein (g/100mL)   | 1.32 (1.27, 1.38)  | 1.27 (1.20, 1.35)    | 1.04 (0.95, 1.14) | 0.419          |
| <b>Maternal age</b>       | <b>≥ 35 years</b>  | <b>&lt; 35 years</b> | <b>aMD</b>        | <b>p-value</b> |
| Fat (g/100mL)             | 3.62 (3.37, 3.88)  | 3.79 (3.66, 3.92)    | 0.95 (0.88, 1.03) | 0.231          |
| Energy (kcal/100mL)       | 68.4 (66.2, 70.7)  | 70.5 (69.3, 71.7)    | 0.97 (0.93, 1.01) | 0.112          |
| Lactose (g/100mL)         | 6.96 (6.87, 7.05)  | 7.08 (7.04, 7.13)    | 0.98 (0.97, 1.00) | <b>0.020</b>   |
| Crude protein (g/100mL)   | 1.29 (1.23, 1.36)  | 1.30 (1.27, 1.34)    | 0.99 (0.94, 1.05) | 0.812          |
| <b>Delivery mode</b>      | <b>C-section</b>   | <b>Vaginal</b>       | <b>aMD</b>        | <b>p-value</b> |
| Fat (g/100mL)             | 3.95 (3.39, 3.81)  | 3.82 (3.69, 3.96)    | 0.94 (0.88, 1.01) | 0.075          |
| Energy (kcal/100mL)       | 68.3 (66.4, 70.2)  | 70.8 (69.6, 72.0)    | 0.97 (0.93, 1.00) | <b>0.034</b>   |
| Lactose (g/100mL)         | 7.01 (6.94, 7.09)  | 7.08 (7.03, 7.12)    | 0.99 (0.98, 1.00) | 0.182          |
| Crude protein (g/100mL)   | 1.30 (1.24, 1.35)  | 1.30 (1.27, 1.34)    | 1.00 (0.95, 1.05) | 0.883          |
| <b>Parity</b>             | <b>Multiparous</b> | <b>Primiparous</b>   | <b>aMD</b>        | <b>p-value</b> |
| Fat (g/100mL)             | 3.61 (3.43, 3.80)  | 3.84 (3.70, 3.99)    | 0.94 (0.88, 1.00) | 0.056          |
| Energy (kcal/100mL)       | 68.5 (66.9, 70.2)  | 71.0 (69.7, 72.2)    | 0.97 (0.94, 1.00) | <b>0.023</b>   |
| Lactose (g/100mL)         | 7.04 (6.97, 7.11)  | 7.07 (7.02, 7.12)    | 1.00 (0.98, 1.01) | 0.465          |
| Crude protein (g/100mL)   | 1.26 (1.21, 1.31)  | 1.33 (1.29, 1.36)    | 0.95 (0.91, 0.99) | <b>0.022</b>   |
| <b>Infant sex</b>         | <b>Female</b>      | <b>Male</b>          | <b>aMD</b>        | <b>p-value</b> |
| Fat (g/100mL)             | 3.71 (3.56, 3.86)  | 3.82 (3.65, 3.99)    | 0.97 (0.92, 1.03) | 0.363          |
| Energy (kcal/100mL)       | 69.7 (68.3, 71.0)  | 70.6 (69.1, 72.2)    | 0.99 (0.96, 1.02) | 0.357          |
| Lactose (g/100mL)         | 7.05 (7.00, 7.10)  | 7.07 (7.01, 7.13)    | 1.00 (0.99, 1.01) | 0.651          |
| Crude protein (g/100mL)   | 1.30 (1.26, 1.34)  | 1.31 (1.27, 1.35)    | 0.99 (0.95, 1.04) | 0.734          |
| <b>Gestational age</b>    | <b>Preterm</b>     | <b>Term</b>          | <b>aMD</b>        | <b>p-value</b> |
| Fat (g/100mL)             | 4.01 (3.61, 4.44)  | 3.73 (3.61, 3.85)    | 1.07 (0.96, 1.20) | 0.191          |
| Energy (kcal/100mL)       | 71.6 (68.1, 75.2)  | 69.9 (68.9, 71.0)    | 1.02 (0.97, 1.08) | 0.372          |
| Lactose (g/100mL)         | 6.97 (6.84, 7.11)  | 7.07 (7.03, 7.11)    | 0.99 (0.97, 1.01) | 0.185          |
| Crude protein (g/100mL)   | 1.35 (1.25, 1.45)  | 1.30 (1.27, 1.33)    | 1.04 (0.96, 1.12) | 0.333          |

Data are least-squares means (i.e., adjusted mean) for each group or the adjusted mean difference (aMD) and respective 95% confidence intervals derived from repeated measures analyses, adjusted for randomisation group, visit, their interaction term (group\*visit), maternal pre-pregnancy BMI, gestational age at birth, and adherence. All data have been log-transformed to approximate a normal distribution and then back-transformed; thus, the aMD represents a proportional difference between the groups. Bold font indicates statistically significant p-value <0.05.
